# Supplementary material for: A hydrothermally stable transition alumina by condensation-enhanced self-assembly and pyrolysis crystallization: application in the steam reforming of methane
Source: Royal Society of Chemistry journal article supplement (doi:10.1039/c4ce00880d), 2014-01-01
Supplement: c4ce00880d1.pdf [file c4ce00880d1.pdf]

## Supplementary Information

Hydrothermally stable transition alumina by  
condensation-enhanced self-assembly and pyrolysis  
crystallization. Application in the steam reforming of  
methane.

Lidia López Pérez,<sup>a</sup> Consuelo Alvarez-Galván,<sup>b</sup> Valeriya Zarubina,<sup>a</sup> Bruno O.

Figueiredo Fernandes<sup>a</sup> and Ignacio Melián-Cabrera <sup>a\*</sup>

a. Chemical Reaction Engineering (ITM), Faculty of Mathematics and Natural Sciences, University  
of Groningen, Nijenborgh 4, 9747 AG Groningen, The Netherlands.

b. Sustainable Energy and Chemistry Group, Instituto de Catálisis y Petroleoquímica, CSIC. C/  
Marie Curie 2, Madrid 28049, Spain.

Corresponding Author:

[i.v.melian.cabrera@rug.nl](mailto:i.v.melian.cabrera@rug.nl) (Ignacio Melián Cabrera)

## 1. Additional results

**Table S-1.** Textural properties of the materials after the steaming tests.

| Material                       | Steaming    | $S_{\text{BET}}$ ( $\text{m}^2\cdot\text{g}^{-1}$ ) | $V_{\text{T}}$ ( $\text{cm}^3\cdot\text{g}^{-1}$ ) | $\Phi_{\text{BJH}}$ (nm) |
|--------------------------------|-------------|-----------------------------------------------------|----------------------------------------------------|--------------------------|
| TAN-1                          | none        | 64                                                  | 0.176                                              | 13.6                     |
| TAN-1 ST900.4                  | 900 °C, 4h  | 61                                                  | 0.166                                              | 13.6                     |
| TAN-1 ST900.24                 | 900 °C, 24h | 56                                                  | 0.133                                              | 14.1                     |
| $\delta$ -alumina <sup>a</sup> | none        | 94                                                  | 0.272                                              | 10.0                     |
| $\delta$ -alumina ST900.4      | 900 °C, 4h  | 55                                                  | 0.253                                              | 25.0                     |
| $\delta$ -alumina ST900.24     | 900 °C, 24h | 48                                                  | 0.241                                              | 30.0                     |

a. Obtained by thermally treating a commercial  $\gamma$ -alumina (Merck) at 900 °C for 6 h following the protocol reported by Rane *et al.* <sup>59</sup>

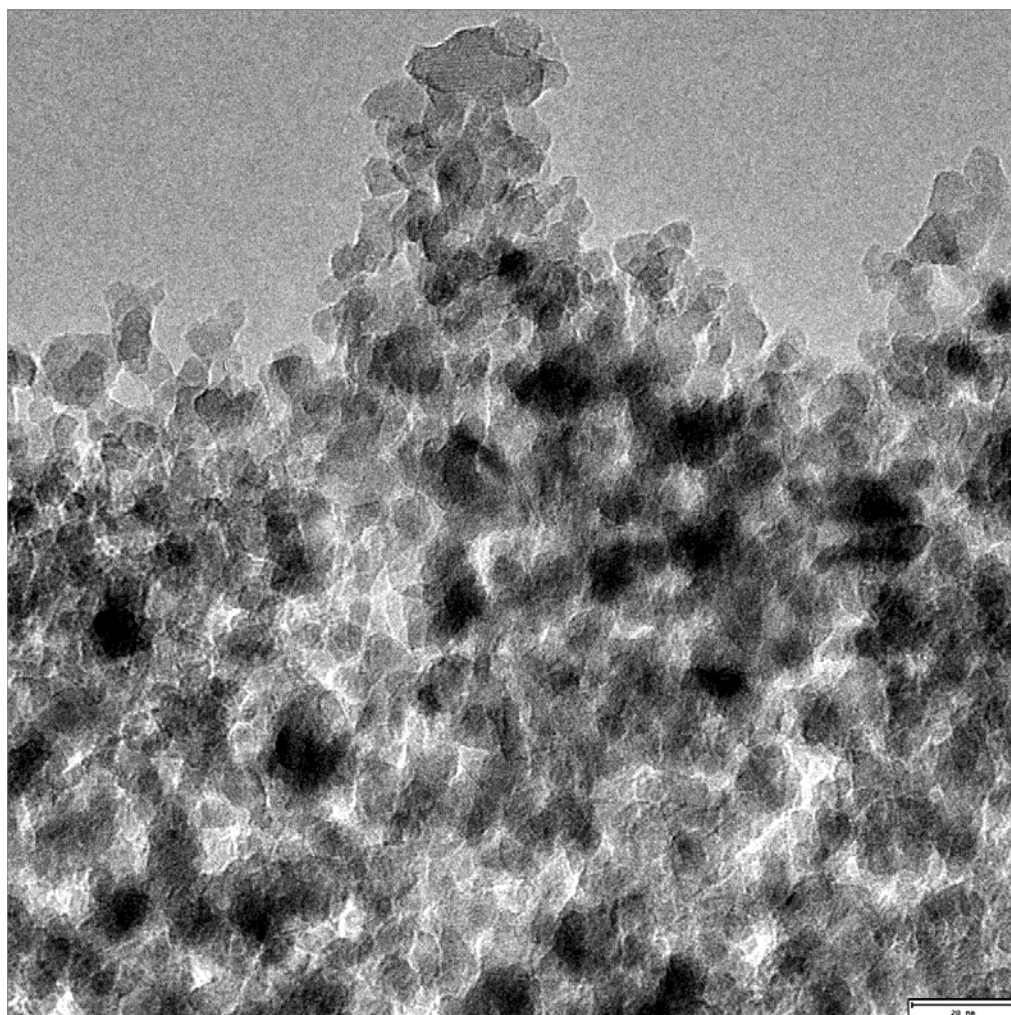

**Figure S-1.** High-resolution TEM image of TAN-1. Scale-bar corresponds to 20 nm.

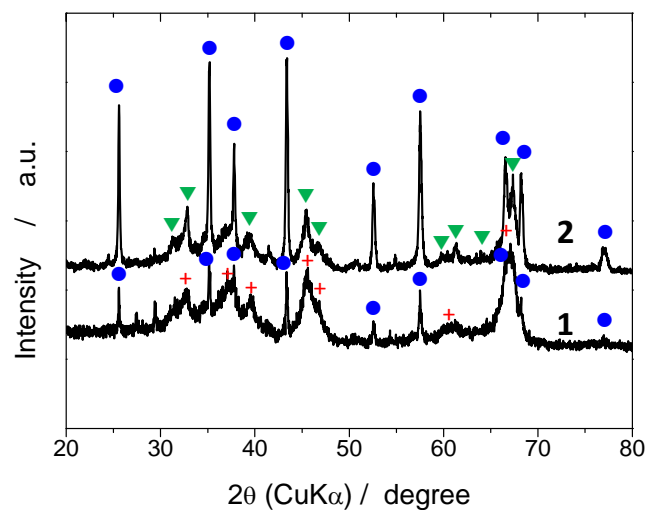

**Figure S-2.** Indexed XRD patterns for the pyrolyzed materials: **1)** TAN-1 and **2)** TAN-4. Phase notation: Alpha (●)<sup>56</sup>, theta (▼)<sup>57</sup> and delta (+)<sup>58</sup>. The patterns are offset in Y-axis. Sample codes can be found in Table 1.

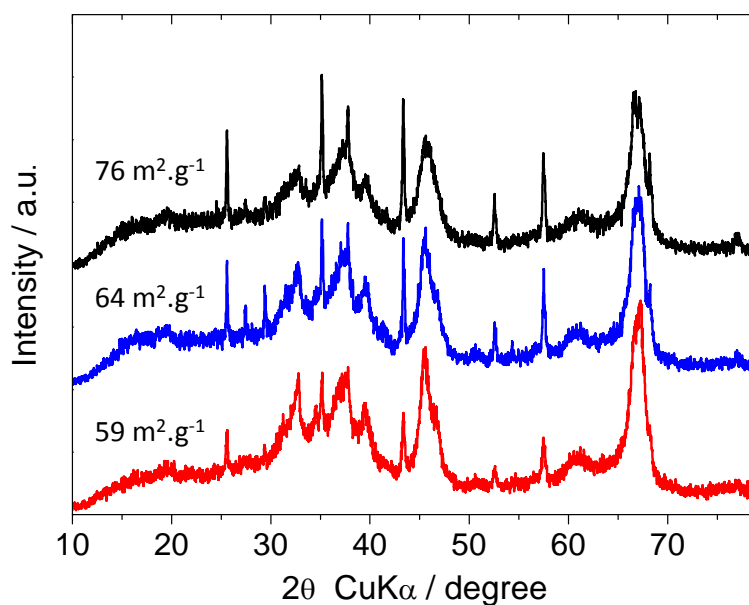

**Figure S-3.** XRD patterns of several batches for TAN-1 including the corresponding specific surface area. The patterns are offset in Y-axis.

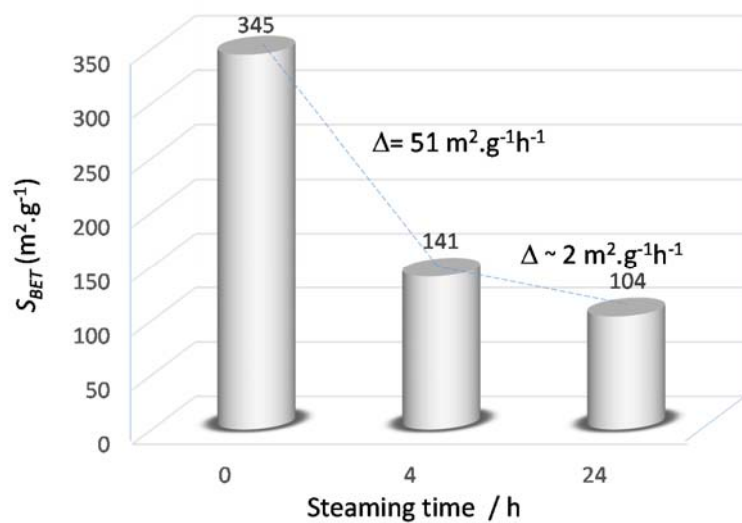

**Figure S-4.** Stability under steaming (100 vol.%, 900 °C) for a commercial mesostructured gamma alumina (MSU-X). Representation of the  $S_{BET}$  as a function of the steaming time, in h.

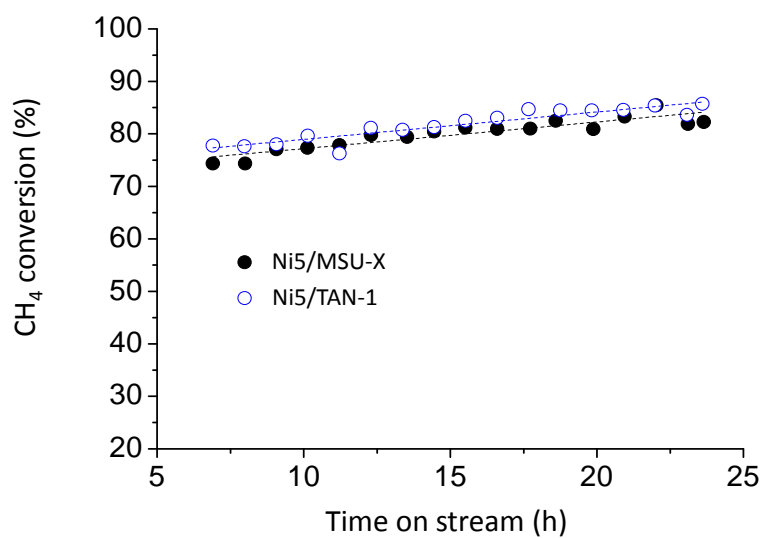

**Figure S-5.** CH<sub>4</sub> conversion (%) for the SRM reaction as a function of time on stream for Ni5/MSU-X and Ni5/TAN-1 catalysts.
